# Supplementary material for: Mulberry Leaf Dietary Supplementation Can Improve the Lipo-Nutritional Quality of Pork and Regulate Gut Microbiota in Pigs: A Comprehensive Multi-Omics Analysis
Source: MDPI journal article supplement (doi:10.3390/ani14081233), 2024-04-19

## ***Supplementary Material***

### **Supplementary Figures and Tables**

#### **Supplementary Tables**

##### **Supplementary Table S1.** The nutritional composition of the daily diet

| Diet composition (%)    | CON group | ML group |
|-------------------------|-----------|----------|
| Mulberry leaves         | 0.00      | 8.00     |
| Soybean meal            | 14.00     | 14.00    |
| Puffing of soybean      | 5.00      | 5.00     |
| Soy protein concentrate | 1.00      | 1.00     |
| Wheat bran              | 7.00      | 0.00     |
| corn                    | 61.00     | 60.60    |
| Protect merchant        | 0.30      | 0.30     |
| Fish meal               | 0.00      | 0.00     |
| A powder                | 6.00      | 5.00     |
| salt                    | 0.40      | 0.40     |
| Soybean oil             | 1.00      | 1.00     |
| montmorillonite         | 0.20      | 0.20     |
| In the pig premix       | 2.00      | 2.00     |
| Stone powder            | 1.20      | 1.20     |
| Calcium hydrogen        | 1.00      | 1.40     |

|                                 |        |        |
|---------------------------------|--------|--------|
| A combined                      | 100.10 | 100.10 |
| Total digestible energy (MJ/kg) | 13.85  | 13.60  |
| Crude protein (%)               | 15.60  | 15.66  |
| Lysine (%)                      | 0.94   | 0.93   |
| (egg + cysteine) (%)            | 0.65   | 0.63   |
| Threonine (%)                   | 0.52   | 0.50   |
| Tryptophan (%)                  | 0.22   | 0.21   |
| Calcium (%)                     | 0.82   | 0.85   |
| Total phosphorus (%)            | 0.54   | 0.55   |

Note: per kg of premix to feed: Fe,155mg/kg diet; Cu,200mg; n 140mg; Mn,50mg; VA,17500IU; VE,20IU; Riboflavin, 3.6mg; Niacin, 27mg; Pantothenic acid, 13mg; B12, 0.09 mg; Biotin, 0.15mg; Choline, 0.92mg

**Supplementary Table S2** The primer sequence of qPCR

| Primer name      | Sequence (5'-3')      |
|------------------|-----------------------|
| ACC-F            | GGCCATCAAGGACTTCAACC  |
| ACC-R            | ACGATGTAAGCGCCGAACCTT |
| FASN-F           | GTCCTGCTGAAGCCTAACTC  |
| FASN-R           | TCCTTGGAACCGTCTGTG    |
| PPAR $\gamma$ -F | AGCCCTTTGGTGACTT      |
| PPAR $\gamma$ -R | AGGACTCTGGGTGGTT      |

|                  |                        |
|------------------|------------------------|
| FABP4-F          | CTGAGATTGCCTTCAAATTG   |
| FABP4-R          | CTTGGCTTATGCTCTCTCATA  |
| LPL-F            | CTCGTGCTCAGATGCCCTAC   |
| LPL-R            | GGCAGGGTGAAAGGGATGTT   |
| PPAR $\alpha$ -F | AGAGCCCCATCTGTCCTCTC   |
| PPAR $\alpha$ -R | ACTGGTAGTCTGCAAAACCAAA |
| HSL-F            | CTTTCGCACCAGCCACAAC    |
| HSL-R            | CTCGTCGCCCTCAAAGAAGA   |
| DGAT1-F          | TGGACTACTCACGCATCAT    |
| DGAT1-R          | GTGGAAGAGCCAGTAGAAGAA  |

---

## Supplementary Figure

### Supplementary Figure S1 Species rarefaction curve

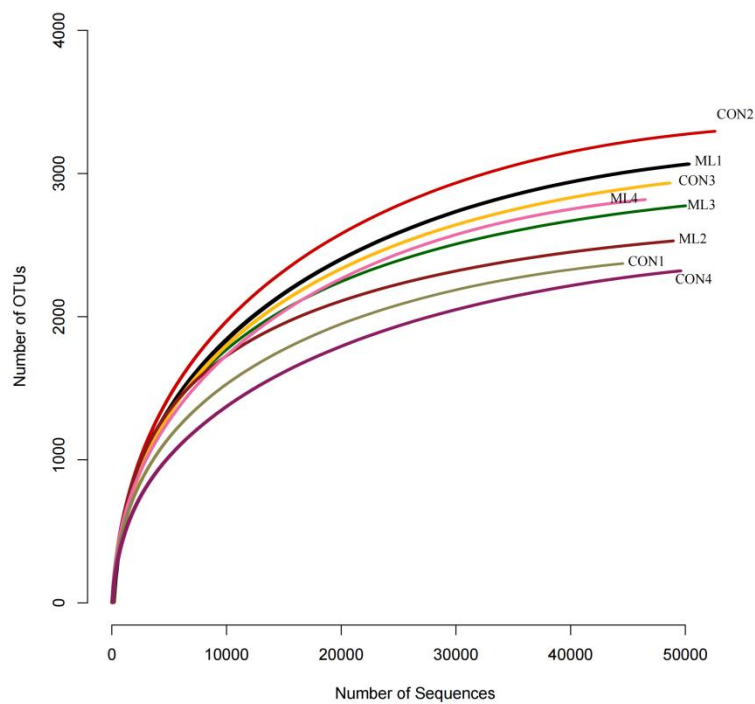

Supplementary Figure S2 The index of Chao1 Shannon Simpson

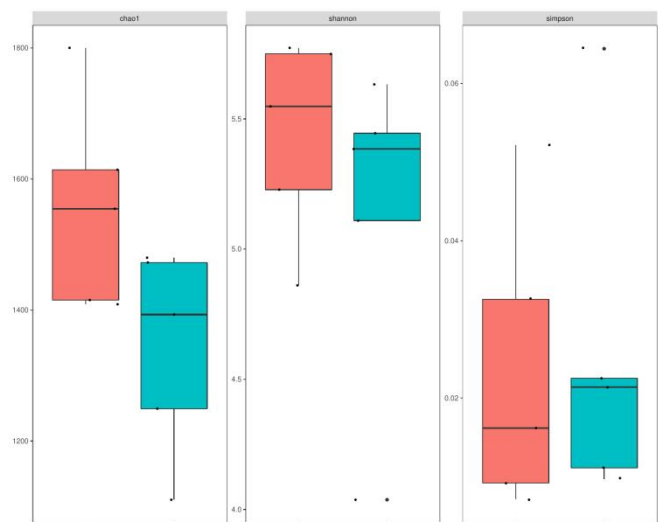

Supplement: s1 [file s1]
